# Supplementary material for: Effect-Based Approach to Assess Nanostructured Cellulose Sponge Removal Efficacy of Zinc Ions from Seawater to Prevent Ecological Risks
Source: PubMed Central journal article supplement (PMC7407410; doi:10.3390/nano10071283), 2020-06-30
Supplement: nanomaterials-10-01283-s001.pdf [file nanomaterials-10-01283-s001.pdf]

## Supplementary material

# Effect-based approach to assess nanostructured cellulose sponge removal efficacy of Zinc ions from seawater to prevent ecological risks

Giulia Liberatori <sup>1</sup>, Giacomo Grassi <sup>1</sup>, Patrizia Guidi <sup>2</sup>, Margherita Bernardeschi <sup>2</sup>,  
Andrea Fiorati <sup>3</sup>, Vittoria Scarcelli <sup>2</sup>, Massimo Genovese <sup>2</sup>, Claudia Faleri <sup>4</sup>, Giuseppe Protano <sup>1</sup>, Giada Frenzilli <sup>2,\*</sup>, Carlo Punta <sup>3</sup> and Ilaria Corsi <sup>1,\*</sup>

<sup>1</sup> Department of Physical, Earth and Environmental Sciences and INSTM Local Unit, University of Siena, 53100 Siena, Italy; giulia.liberatori@student.unisi.it (G.L.); grassi23@student.unisi.it (G.G.); giuseppe.protano@unisi.it (G.P.)

<sup>2</sup> Department of Clinical and Experimental Medicine-section of Applied Biology and Genetics, University of Pisa, 56126 Pisa, Italy; patrizia.guidi@unipi.it (P.G.); margherita.bernardeschi@unipi.it (M.B.); vittoria.scarcelli@unipi.it (V.S.); massimo.genovese@unipi.it (M.G.)

<sup>3</sup> Department of Chemistry, Materials, and Chemical Engineering “G. Natta” and INSTM Local Unit, Politecnico di Milano, 20131 Milano, Italy; andrea.fiorati@polimi.it (A.F.); carlo.punta@polimi.it (C.P.)

<sup>4</sup> Department of Life Sciences, University of Siena, 53100 Siena, Italy; faleric@unisi.it

\* Correspondence: ilaria.corsi@unisi.it (I.C.); giada@biomed.unipi.it (G.F.); Tel.: +39-0577-232168 (I.C.); +30-050-2219111 (G.F.)

Number of figures: 3

Number of tables: 1

Number of pages: 4

**Tab. S1.** pH levels measured in the water media of both experiments at T<sub>0</sub> and T<sub>24h</sub> in the groups: ASW (control); Zn(II) 1, 10, 100 mg L<sup>-1</sup> in ASW; CNS (ASW treated with only CNS); Zn(II)(10mg L<sup>-1</sup> in ASW); Zn t-CNS (Zn(II) 10mg L<sup>-1</sup> after CNS treatment).

|                                                                | <b>Experimental groups</b>    | <b>T<sub>0</sub></b> | <b>T<sub>24h</sub></b> |
|----------------------------------------------------------------|-------------------------------|----------------------|------------------------|
| <b>ZnCl<sub>2</sub> sub-lethal effect conc. Exposure study</b> | ASW                           | 7.94 ± 0.07          | 7.96 ± 0.16            |
|                                                                | Zn(II) 1 mg L <sup>-1</sup>   | 7.89 ± 0.07          | 7.9 ± 0.12             |
|                                                                | Zn(II) 10 mg L <sup>-1</sup>  | 7.78 ± 0.07          | 7.83 ± 0.17            |
|                                                                | Zn(II) 100 mg L <sup>-1</sup> | 7.45 ± 0.08          | 7.48 ± 0.06            |
| <b>Effect-based study on CNS adsorption ability</b>            | ASW                           | 7.70 ± 0.14          | 7.72 ± 0.18            |
|                                                                | CNS                           | 8.32 ± 0.26          | 8.04 ± 0.35            |
|                                                                | Zn(II)                        | 7.53 ± 0.14          | 7.70 ± 0.10            |
|                                                                | Zn t-CNS                      | 8.12 ± 0.28          | 8.01 ± 0.13            |

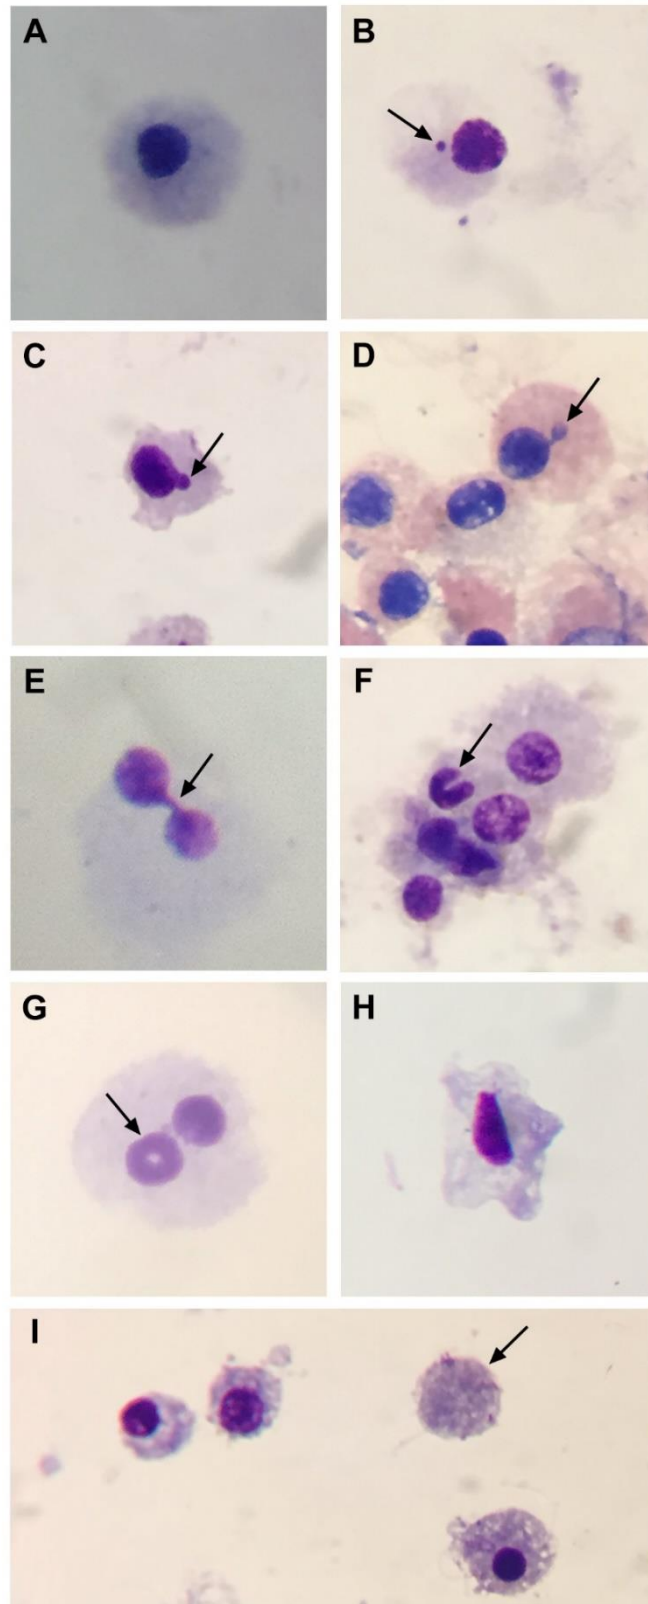

**Fig. S1.** Nuclear abnormalities (NA) observed in mussel gill cells (stained with 6% Giemsa). (A) Control cell. (B) Cell with micronucleus. (C) Bleb. (D) Bud. (E) Nuclear bridge. (F) Notched nucleus. (G) Circular nucleus. (H) Lobed nucleus. (I) Anisochromatic cell.

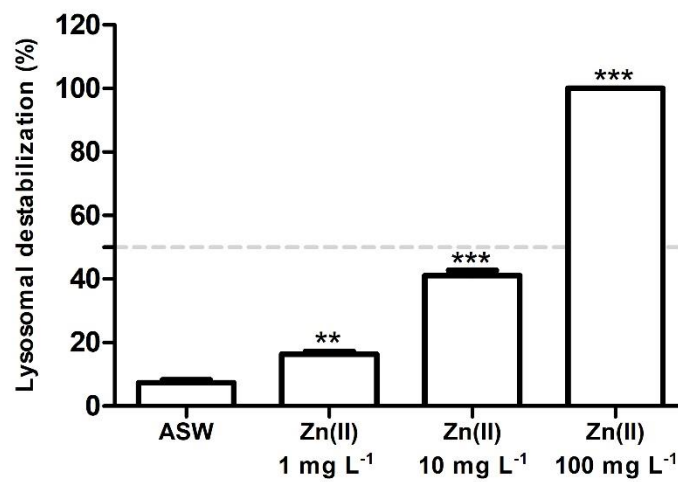

**Fig. S2.** Percentage of lysosomal membranes destabilization in mussel hemocytes after 48h of exposure in the following experimental groups exposed to ZnCl<sub>2</sub> (1, 10, 100 mgL<sup>-1</sup> in ASW). The dashed line indicates the reading limit of the destabilized cells (50%). Results are reported as mean ± SD. (\*\*\*) , (\*\*) indicates significant differences respect to the control group, corresponding to  $p < 0.0001$  and  $p < 0.001$  respectively.

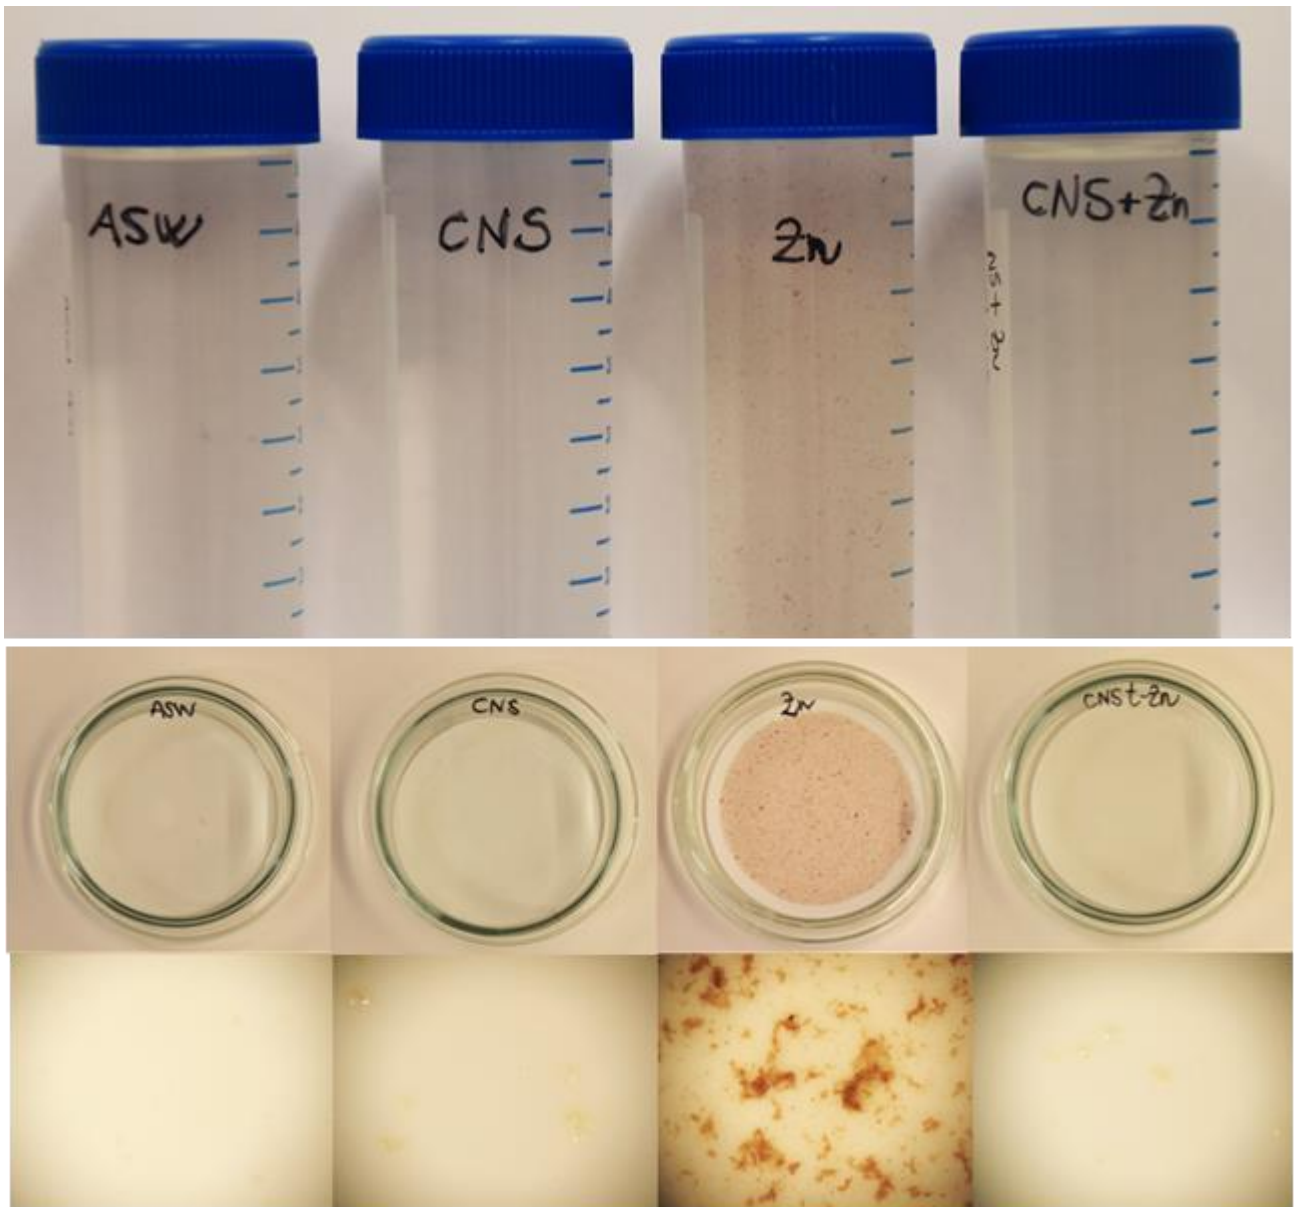

**Fig. S3.** Falcon tubes containing water exposure media after 24h ( $T_{24h}$ ) of the following experimental groups: ASW (control); CNS (ASW treated with only CNS); Zn(II)( $ZnCl_2$   $10mg\ L^{-1}$  contaminated ASW); CNS t-Zn ( $ZnCl_2$  ( $10mg\ L^{-1}$ ) contaminated ASW after CNS treatment). Details on  $0.45\ \mu m$  filter cellulose paper and at higher magnification ( $40\times$ ) under light microscope.
